# Supplementary material for: The New Haplotypes of Bartonella spp. and Borrelia burgdorferi Sensu Lato Identified in Lipoptena spp. (Diptera: Hippoboscidae) Collected in the Areas of North-Eastern Poland
Source: MDPI journal article supplement (doi:10.3390/pathogens11101111), 2022-09-28
Supplement: s1 [file s1]

**Table S2.** List of species and GenBank accession numbers of their flagellin gene (*fla B*) sequences used in the network phylogenetic analysis (Figure 2 and 4).

| Symbol of haplotype | Scientific name                        | GenBank accession number | Sequence references |
|---------------------|----------------------------------------|--------------------------|---------------------|
| H1                  | <i>Borrelia afzelii</i>                | ON016088                 | This study          |
| H2                  | <i>Borrelia burgdorferi</i>            | ON016089<br>HM345911     | This study<br>[45]  |
| H3                  | <i>Borrelia burgdorferi</i>            | ON016090                 | This study          |
| H4                  | <i>Borrelia burgdorferi</i>            | ON016091                 | This study          |
| H5                  | <i>Borrelia afzelii</i>                | KR782180                 | Unpublished         |
| H6                  | <i>Borrelia afzelii</i>                | KR782182                 | Unpublished         |
| H7                  | <i>Borrelia afzelii</i>                | MG944962                 | Unpublished         |
| H8                  | <i>Borrelia afzelii</i>                | KR782190                 | Unpublished         |
| H9                  | <i>Borrelia afzelii</i>                | JF732879                 | Unpublished         |
| H10                 | <i>Borrelia afzelii</i>                | KF918616                 | Unpublished         |
| H11                 | <i>Borrelia afzelii</i>                | MN958344                 | [46]                |
| H12                 | <i>Borrelia burgdorferi</i>            | AB091813                 | [47]                |
| H13                 | <i>Borrelia burgdorferi</i>            | X75200                   | [48]                |
| H14                 | <i>Borrelia burgdorferi</i>            | KF422801                 | [49]                |
| H15                 | <i>Borrelia burgdorferi</i>            | KF422799                 | Unpublished         |
| H16                 | <i>Borrelia burgdorferi</i>            | KF422875                 | [49]                |
| H17                 | <i>Borrelia burgdorferi</i>            | DQ016620                 | [45]                |
| H18                 | <i>Borrelia burgdorferi</i>            | HM345910                 | [45]                |
| H19                 | <i>Borrelia burgdorferi</i>            | KT963084                 | Unpublished         |
| H20                 | <i>Borrelia lusitaniae</i>             | AB091809                 | [47]                |
| H21                 | <i>Borrelia garinii</i>                | L42885                   | [50]                |
| H22                 | <i>Borrelia garinii</i>                | KF894058                 | Unpublished         |
| H23                 | <i>Borrelia garinii</i>                | KX646202                 | Unpublished         |
| H24                 | <i>Borrelia valaisiana</i>             | EU135600                 | [51]                |
| H25                 | <i>Borrelia yangtzensis</i>            | EU135599                 | [51]                |
| H26                 | <i>Borrelia yangtzensis</i>            | EU135603                 | [51]                |
| H27                 | <i>Candidatus Borrelia tachyglossi</i> | KY586966                 | [52]                |
| H28                 | <i>Borrelia miyamotoi</i>              | FJ823229                 | [45]                |

## References:

40. Bai, Y.; Malania, L.; Alvarez Castillo, D.; Moran, D.; Boonmar, S.; Chanlun, A.; Suksawa, F.; Maruyama, S.; Knobel, D.; Kosoy, M. Global distribution of Bartonella infections in domestic bovine and characterization of Bartonella bovis strains using multi-locus sequence typing. *PLoS One*, **2013**, 21:e80894. doi: 10.1371/journal.pone.0080894.
41. Antequera-Gómez, M.L.; Lozano-Almendral, L.; Barandika, J.F.; González-Martín-Niño, R.M.; Rodríguez-Moreno, I.; García-Pérez, A.L.; Gil, H. Bartonella chomelii is the most frequent species infecting cattle grazing in communal mountain pastures in Spain. *Appl Environ Microbiol*, **2015** 81:623-9. doi: 10.1128/AEM.03159-14.
42. Lozano-Sardaneta, Y.N.; Blum-Domínguez, S.; Huerta, H.; Tamay-Segovia, P.; Fernández-Figueroa, E.A.; Becker, I.; Sánchez-Montes, S. Detection of Candidatus Bartonella odocoilei n. sp. in Lipoptena mazamae associated with white-tailed deer in Campeche, Mexico. *Med Vet Entomol*. **2021**, 35:652-657. doi: 10.1111/mve.12536.
43. Mediannikov, O.; Davoust, B.; Cabre, O.; Rolain, J.M.; Raoult, D. Bartonellae in animals and vectors in New Caledonia. *Comp Immunol Microbiol Infect Dis*. **2011**, 34:497-501. doi: 10.1016/j.cimid.2011.09.002.
44. Bazrgari, N.; Garoosi, G.A.; Dadar, M. Genetic Diversity and Phylogenetic Relationship of Clinical Isolates of Brucella melitensis Based on Gene Polymorphism of  $\beta$  Subunit of RNA Polymerase (rpoB) Gene in Iran. *Iran J Med Microbiol*, **2020**, 14: 425-440.
45. Wodecka, B. flaB gene as a molecular marker for distinct identification of Borrelia species in environmental samples by the PCR-restriction fragment length polymorphism method. *Appl Environ Microbiol*. **2011**, 77:7088-92. doi: 10.1128/AEM.05437-11.
46. Naddaf, S.R.; Mahmoudi, A.; Ghasemi, A.; Rohani, M.; Mohammadi, A.; Ziapour, S.P.; Nemati, A.H.; Mostafavi, E. Infection of hard ticks in the Caspian Sea littoral of Iran with Lyme borreliosis and relapsing fever borreliae. *Ticks Tick Borne Dis*. **2020**, 11:101500. doi: 10.1016/j.ttbdis.2020.101500.
47. Güner, E.S.; Hashimoto, N.; Takada, N.; Kaneda, K.; Imai, Y.; Masuzawa, T. First isolation and characterization of Borrelia burgdorferi sensu lato strains from Ixodes ricinus ticks in Turkey. *J Med Microbiol*. **2003**, 52:807-813. doi: 10.1099/jmm.0.05205-0.
48. Noppa, L.; Burman, N.; Sadziene, A.; Barbour, A.G.; Bergström, S. Expression of the flagellin gene in Borrelia is controlled by an alternative sigma factor. *Microbiology (Reading)*. **1995**, 141:85-93. doi: 10.1099/00221287-141-1-85.
49. Wodecka, B.; Skotarczak, B. Identification of host blood-meal sources and Borrelia in field-collected Ixodes ricinus ticks in north-western Poland. *Ann Agric Environ Med*. **2016**, 23:59-63. doi:10.5604/12321966.1196853.
50. Livey, I.; Gibbs, C.P.; Schuster, R.; Dorner, F. Evidence for lateral transfer and recombination in OspC variation in Lyme disease Borrelia. *Mol Microbiol*. **1995** 18:257-69. doi: 10.1111/j.1365-2958.1995.mmi\_18020257.x.
51. Chu, C.Y.; Liu, W.; Jiang, B.G.; Wang, D.M.; Jiang, W.J.; Zhao, Q.M.; Zhang, P.H.; Wang, Z.X.; Tang, G.P.; Yang, H.; Cao, W.C. Novel genospecies of Borrelia burgdorferi sensu lato from rodents and ticks in southwestern China. *J Clin Microbiol*. **2008**, 46:3130-3. doi: 10.1128/JCM.01195-08.
52. Loh, S.M.; Gillett, A.; Ryan, U.; Irwin, P.; Oskam, C. Molecular characterization of 'Candidatus Borrelia tachyglossi' (family Spirochaetaceae) in echidna ticks, Bothriocroton concolor. *Int J Syst Evol Microbiol*. **2017**, 67:1075-1080. doi: 10.1099/ijsem.0.001929.
