# Supplementary material for: The New Haplotypes of Bartonella spp. and Borrelia burgdorferi Sensu Lato Identified in Lipoptena spp. (Diptera: Hippoboscidae) Collected in the Areas of North-Eastern Poland
Source: MDPI journal article supplement (doi:10.3390/pathogens11101111), 2022-09-28
Supplement: s1 [file s1]

**Table S1.** List of species and GenBank accession numbers of their RNA polymerase beta subunit (*rpoB*) gene sequences used in the network phylogenetic analysis (Figure 1 and 3).

| Symbol of haplotype | Scientific name                                  | GenBank accession number | Sequence references |
|---------------------|--------------------------------------------------|--------------------------|---------------------|
| H1                  | <i>Bartonella</i> sp.                            | ON016083                 | This study          |
| H2                  | <i>Bartonella</i> sp.                            | ON016084                 | This study          |
| H3                  | <i>Bartonella</i> sp.                            | ON016085                 | This study          |
| H4                  | <i>Bartonella</i> sp.                            | ON016086                 | This study          |
| H5                  | <i>Bartonella</i> sp.                            | ON016087                 | This study          |
| H6                  | <i>Bartonella capreoli</i>                       | AB703142                 | [17]                |
| H7                  | <i>Bartonella</i> sp.                            | AB703144                 | [17]                |
| H8                  | <i>Bartonella</i> sp.                            | AB703145                 | [17]                |
| H9                  | <i>Bartonella</i> sp.                            | AB703146                 | [17]                |
| H10                 | <i>Bartonella</i> sp.                            | AB703147                 | [17]                |
| H11                 | <i>Bartonella</i> sp.                            | AB703148                 | [17]                |
| H12                 | <i>Bartonella</i> sp.                            | AB703149                 | [17]                |
| H13                 | <i>Bartonella</i> sp.                            | AY805112                 | [27]                |
| H14                 | <i>Bartonella</i> sp.                            | LC485118                 | [18]                |
| H15                 | <i>Bartonella</i> sp.                            | LC485119                 | [18]                |
| H16                 | <i>Bartonella</i> sp.                            | LC485120                 | [18]                |
| H17                 | <i>Bartonella</i> sp.                            | LC485121                 | [18]                |
| H18                 | <i>Bartonella</i> sp.                            | MF580655                 | [26]                |
| H19                 | <i>Bartonella</i> sp.                            | MF580656                 | [26]                |
| H20                 | <i>Bartonella</i> sp.                            | MF580657                 | [26]                |
| H21                 | <i>Bartonella</i> sp.                            | MF580662                 | [26]                |
| H22                 | <i>Bartonella</i> sp.                            | MT876351                 | Unpublished         |
| H23                 | <i>Bartonella</i> sp.                            | MT876361                 | Unpublished         |
| H24                 | <i>Bartonella</i> sp.                            | MT876365                 | Unpublished         |
| H25                 | <i>Bartonella</i> sp.                            | MZ061868                 | [25]                |
| H26                 | <i>Bartonella</i> sp.                            | MZ061869                 | [25]                |
| H27                 | <i>Bartonella bovis</i>                          | KF218224                 | [40]                |
| H28                 | <i>Bartonella bovis</i>                          | KF218220                 | [40]                |
| H29                 | <i>Bartonella bovis</i>                          | KF218217                 | [40]                |
| H30                 | <i>Bartonella chomelii</i>                       | KM215710                 | [41]                |
| H31                 | <i>Candidatus</i><br><i>Bartonella odocoilei</i> | MW076525                 | [42]                |
| H32                 | <i>Candidatus</i><br><i>Bartonella odocoilei</i> | MW076523                 | [42]                |
| H33                 | <i>Bartonella chomelii</i>                       | JN646664                 | [43]                |
| H34                 | <i>Bartonella capreoli</i>                       | HM167505                 | [40]                |
| H35                 | <i>Brucella melitensis</i>                       | MK629660                 | [44]                |
| H36                 | <i>Brucella melitensis</i>                       | MK629659                 | [44]                |
